# Supplementary material for: LS-APC v1.0: a tuning-free method for the linear inverse problem and its application to source-term determination
Source: Copernicus journal article supplement (doi:10.5194/gmd-9-4297-2016), 2016-11-25
Supplement: Supplementary file [file gmd-9-4297-2016-supplement-title-page.pdf › gmd-9-4297-2016-supplement-title-page.pdf]

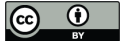

## *Supplement of*

# **LS-APC v1.0: a tuning-free method for the linear inverse problem and its application to source-term determination**

**Ondřej Tichý et al.**

*Correspondence to:* Ondřej Tichý (otichy@utia.cas.cz)

- gmd-9-4297-2016-supplement-title-page.pdf
- LS-APC\_algorithm
  - ETEX1\_Run005\_GF\_0\_2.mat
  - SolveProblem.m
  - SolveSemismooth.m
  - alg\_LSAPC.m
  - alg\_optimReg.m
  - main.m
  - momtrun\_low.m
  - phantom\_04\_noise00.mat
  - phantom\_04\_noise04.mat
  - phantom\_04\_noise08.mat
  - print\_results.m

The copyright of individual parts of the supplement might differ from the CC-BY 3.0 licence.
